# Supplementary material for: Heterogeneity of Early Host Response to Infection with Four Low-Pathogenic H7 Viruses with a Different Evolutionary History in the Field
Source: MDPI journal article supplement (doi:10.3390/v13112323), 2021-11-21
Supplement: s1 [file s1]

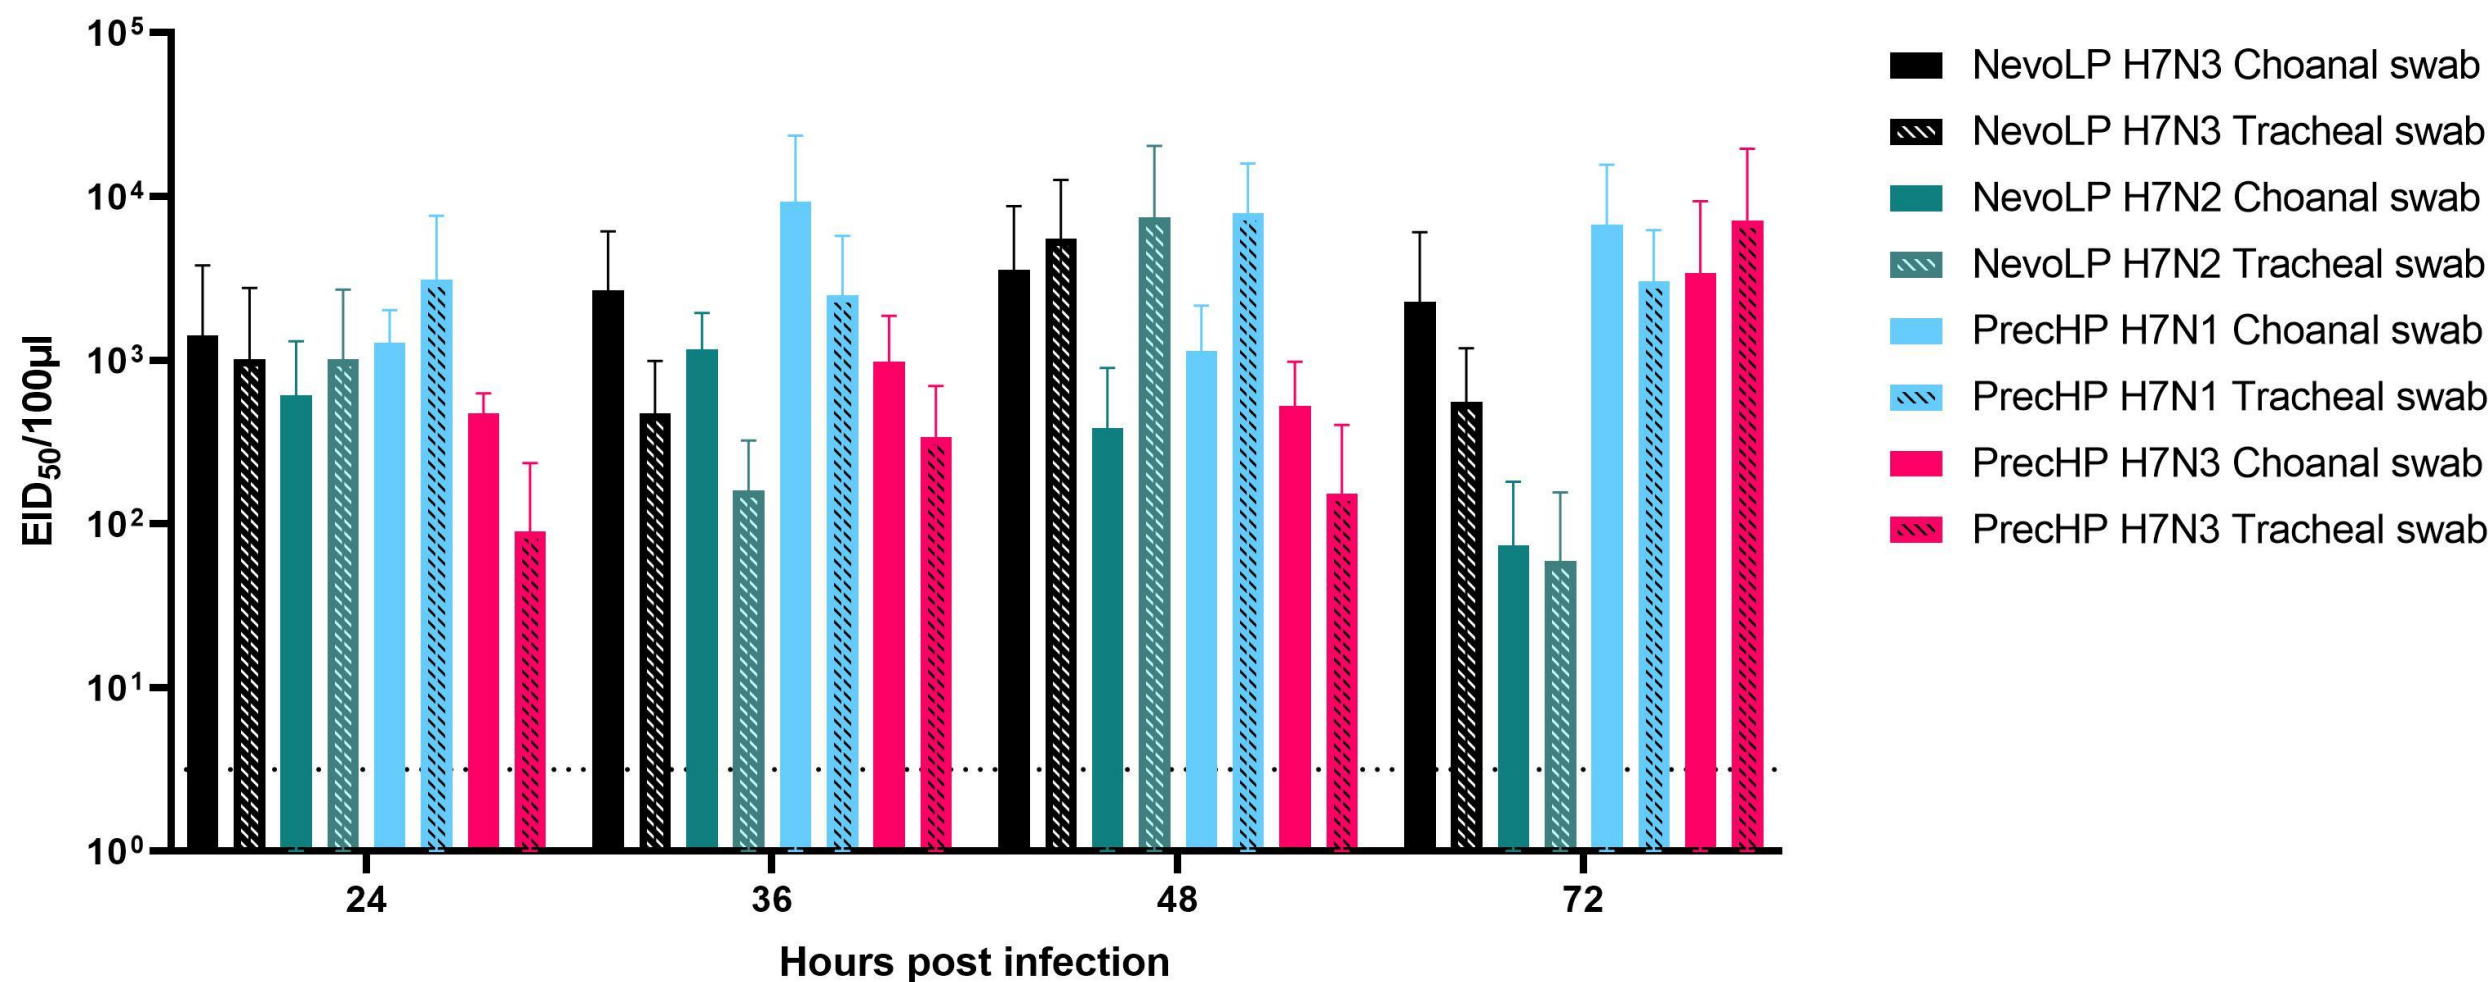

Supplementary Figure3: viral replication in choanal cleft and tracheal swabs by M-gene real-time RT-PCR. For all the experimental groups, values are expressed as the mean viral load ( $EID_{50}/\mu l$ ) of the three biological replicates  $\pm$  SD, over the observation period. The dotted line corresponds to the limit of quantification of the assay.
