# Supplementary material for: Heterogeneity of Early Host Response to Infection with Four Low-Pathogenic H7 Viruses with a Different Evolutionary History in the Field
Source: MDPI journal article supplement (doi:10.3390/v13112323), 2021-11-21
Supplement: s1 [file s1]

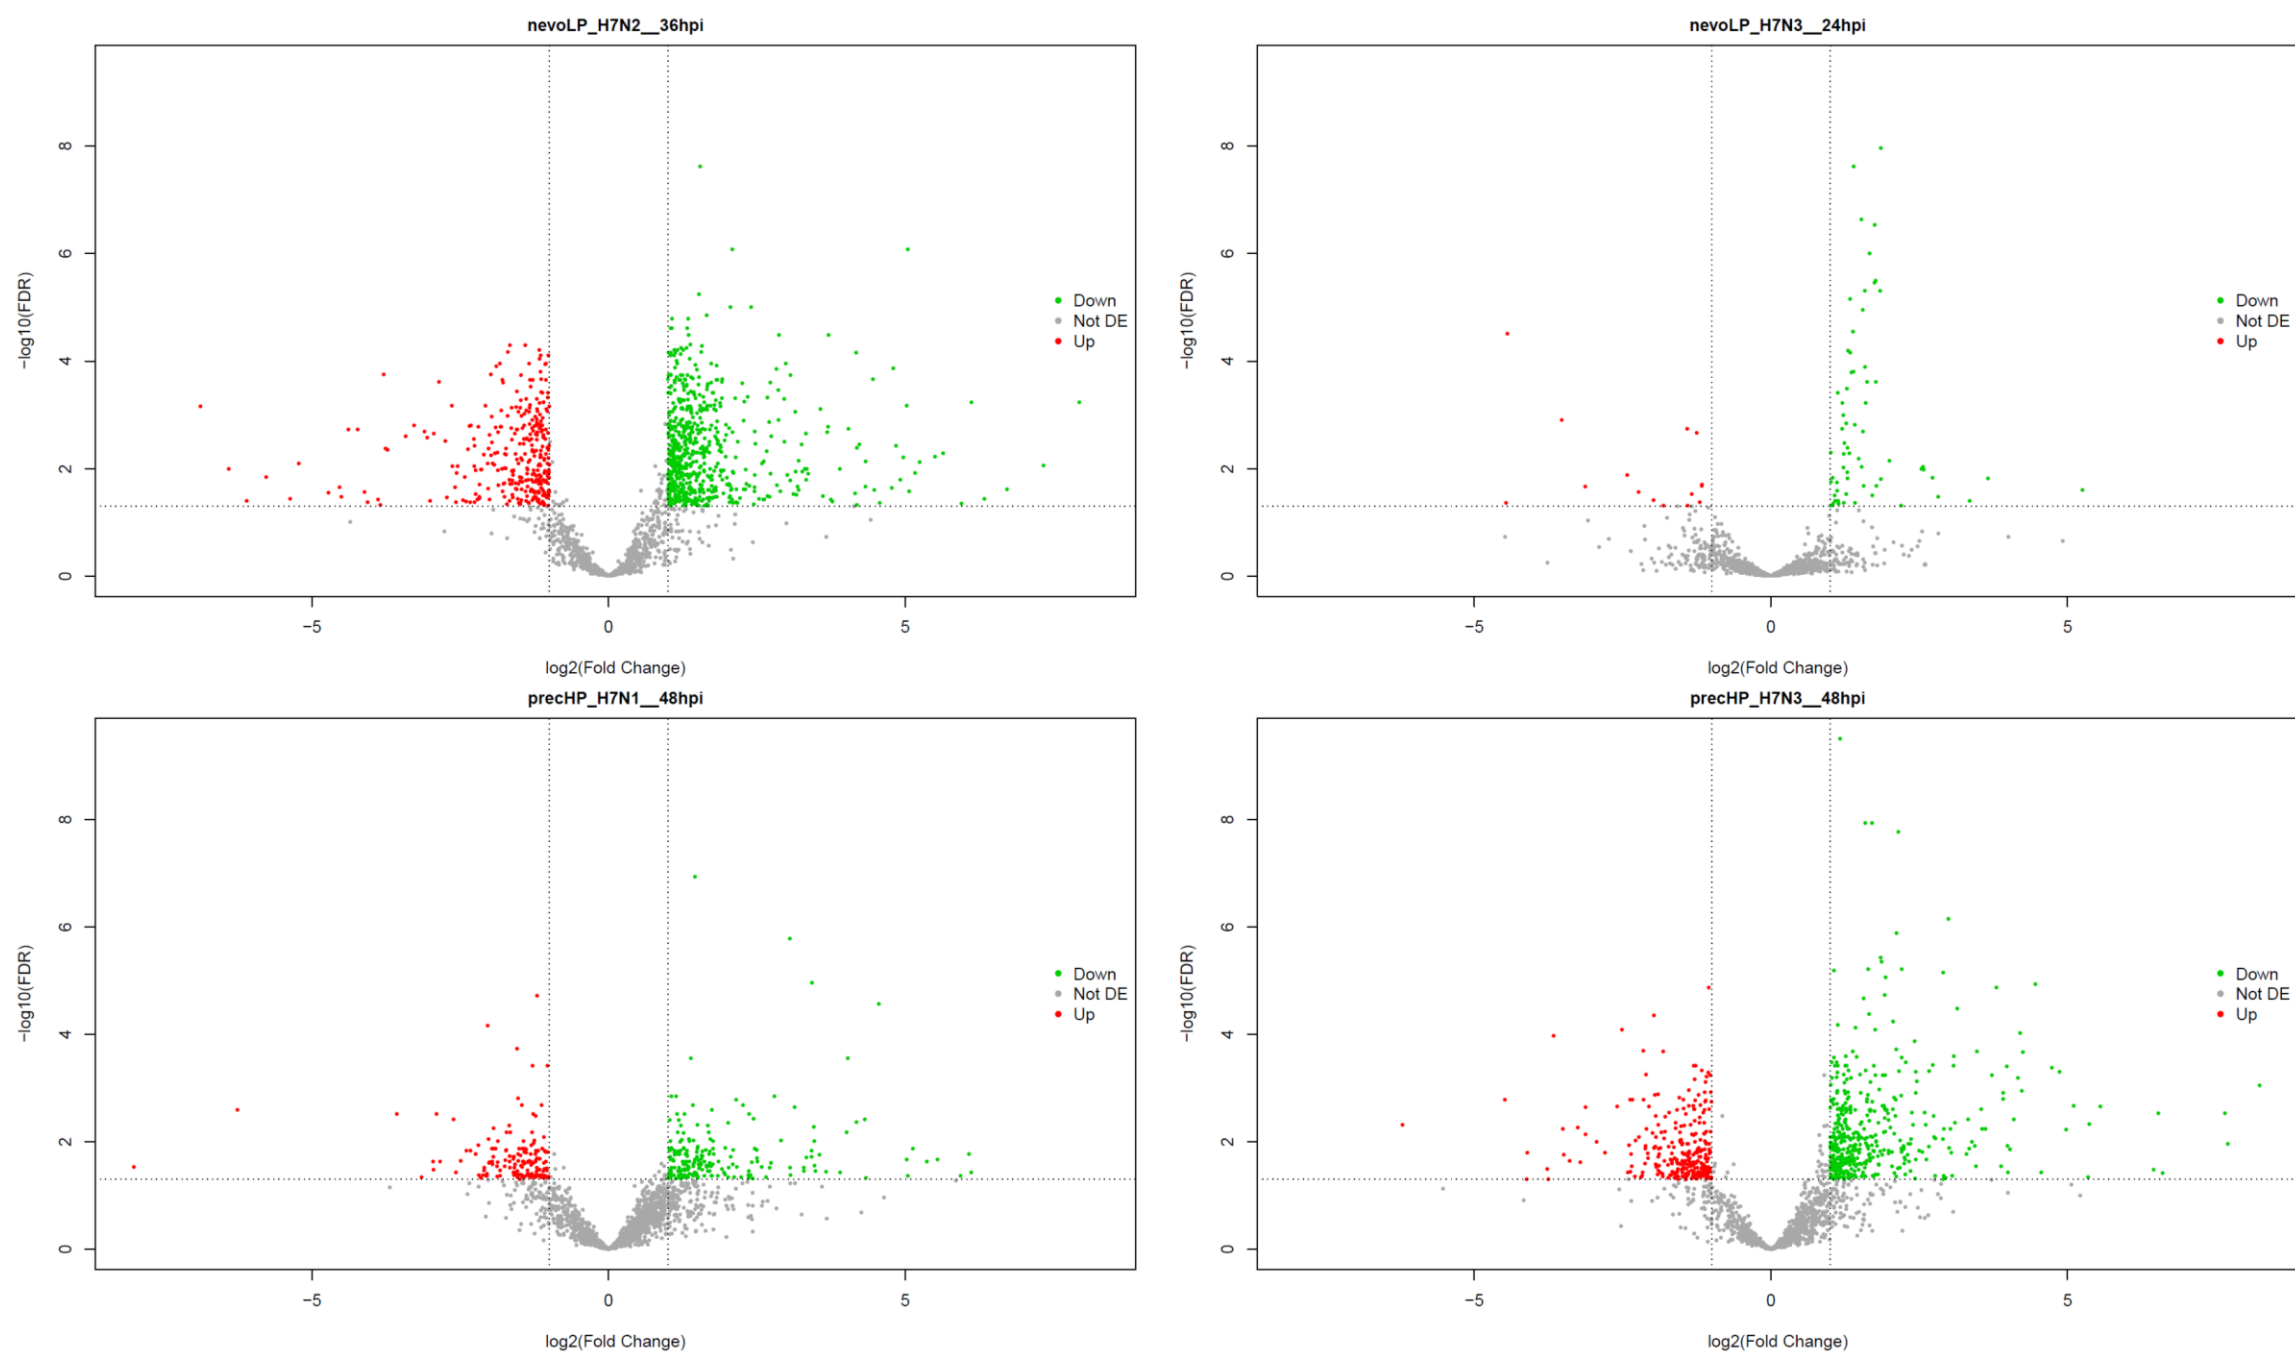

Supplementary Figure 4: volcano plot of genes that resulted as differentially expressed in at least one viral challenge at its peak timepoint.
